# Supplementary material for: Inhibition of the Rho/Rho kinase pathway prevents lipopolysaccharide-induced hyperalgesia and the release of TNF-α and IL-1β in the mouse spinal cord
Source: PubMed Central journal article supplement (PMC4586490; doi:10.1038/srep14553), 2015-09-29

**Title page:**

**Inhibition of the Rho/Rho kinase pathway prevents lipopolysaccharide-induced hyperalgesia and the release of TNF- $\alpha$  and IL-1 $\beta$  in the mouse spinal cord**

Author: Cunjin Wang<sup>1#</sup>, Siyuan Song<sup>2#</sup>, Yang Zhang<sup>1</sup>, Yali Ge<sup>1</sup>, Xiangzhi Fang<sup>1</sup>, Tianfeng Huang<sup>1</sup>, Jin Du<sup>1</sup> and Ju Gao<sup>1\*</sup>

1 Clinical Medical College of Yangzhou University & Department of Anesthesiology, Subei People's Hospital of Jiangsu Province, Yangzhou, China

2 Jiangsu Key Laboratory of Anesthesiology & Jiangsu Key Laboratory of Anesthesia and Analgesia Application Technology, Xuzhou Medical College, Xuzhou, China

# These authors contributed equally to this work.

\*Corresponding Author: Ju Gao. Address: No.98 Nan Tong Western Road, Yangzhou, Jiangsu, 225001, China. E-mail: gaoju\_003@163.com. Tel: +86-0514-87373650.

Supplementary figure legend

**Dose-related effects of C3 exoenzyme (A), (B) and Y27632 (C), (D) on the pain behavior in LPS-treated mice.** C3 exoenzyme, Y27632 or saline was administered intrathecally before LPS. The mechanical hyperalgesia and thermal hyperalgesia were measured 3h after the treatment with LPS. One-way ANOVA,  $*P < 0.05$  compared with saline control,  $n = 8$  mice in each group.

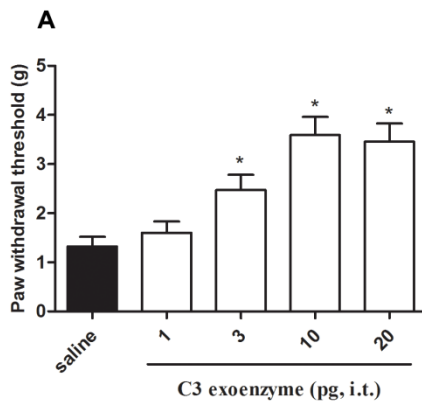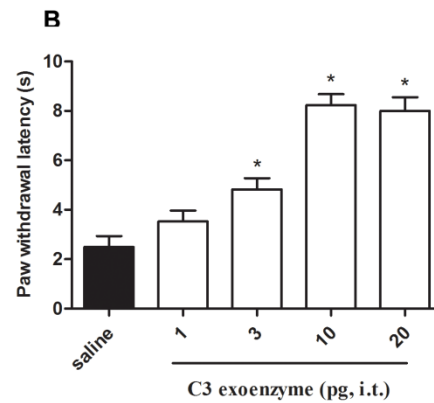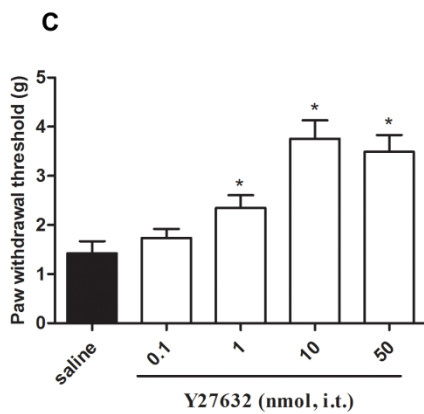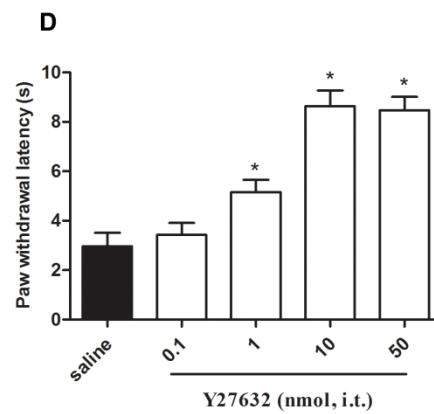

Supplement: srep14553-s1.pdf [file srep14553-s1.pdf]
